# Supplementary material
Source: Springer Nature journal article supplement (https://www.springermedizin.de/resource/supplementary/13033_2013_174_MOESM7_ESM.pdf/9651992)

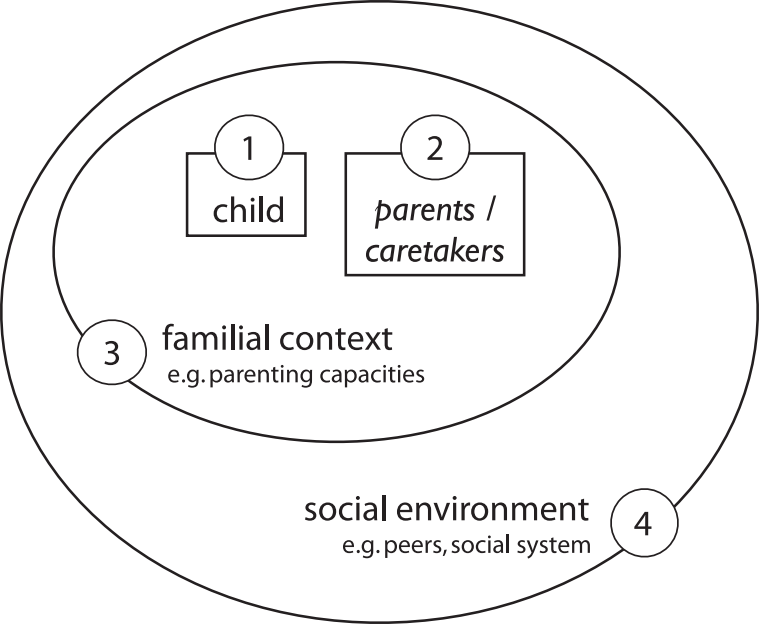

Supplement: MOESM7 [file 9651992]
